# Supplementary material for: Depression in Cape Verdean Adolescents: Prevalence and Associated Factors
Source: Research Square preprint supplement (doi:10.21203/rs.3.rs-7448573/v1), 2025-09-22
Supplement: Supplementary file 1 [file 863d3c8d734b59f4514a2310.docx]

**Annex 3.** Association between depressive symptoms, anxiety, stress, hopelessness, functional impairments, and substance abuse

|  | BDI-II | BAI | BHS | FSCRS | FSCS | DASS - anxiety | DASS - stress | SHEEHAN- Work/studies | SHEEHAN-Social life | SHEEHAN- Love life | ASSIST - Tobacco Products | ASSIST - Alcoholic Beverages | ASSIST - Marijuana | ASSIST - Cocaine/  Crack |
| --- | --- | --- | --- | --- | --- | --- | --- | --- | --- | --- | --- | --- | --- | --- |
| BDI-II | 1 |  |  |  |  |  |  |  |  |  |  |  |  |  |
| BAI | 0.495** | 1 |  |  |  |  |  |  |  |  |  |  |  |  |
| BHS | 0.495** | 0.366** | 1 |  |  |  |  |  |  |  |  |  |  |  |
| FSCRS | 0.148 | 0.290** | 0.030 | 1 |  |  |  |  |  |  |  |  |  |  |
| FSCS | 0.313** | 0.360** | 0.280** | 0.557** | 1 |  |  |  |  |  |  |  |  |  |
| DASS - anxiety | 0.274** | 0.575** | 0.261** | 0.194 | 0.473** | 1 |  |  |  |  |  |  |  |  |
| DASS - stress | 0.365** | 0.570** | 0.242* | 0.410** | 0.559** | 0.797** | 1 |  |  |  |  |  |  |  |
| SHEEHAN- Work/studies | 0.169 | 0.304** | 0.161 | 0.073 | 0.220 | 0.198 | 0.496** | 1 |  |  |  |  |  |  |
| SHEEHAN-Social life | 0.340** | 0.359** | 0.292* | 0.196 | .309** | 0.331** | 0.407** | 0.485** | 1 |  |  |  |  |  |
| SHEEHAN-Love life | 0.242* | 0.398** | 0.184 | 0.148 | .240* | 0.427** | 0.492** | 0.483** | 0.691** | 1 |  |  |  |  |
| ASSIST - Tobacco Products | 0.222 | 0.155 | 0.160 | 0.031 | -0.185 | 0.000 | 0.028 | 0.222 | 0.017 | -0.054 | 1 |  |  |  |
| ASSIST - Alcoholic Beverages | 0.069 | -0.025 | -0.035 | 0.116 | -0.160 | 0.033 | 0.088 | 0.000 | -0.115 | -0.117 | 0.382* | 1 |  |  |
| ASSIST - Marijuana | 0.017 | -0.005 | -0.030 | 0.170 | -0.101 | 0.027 | -0.009 | -0.050 | -0.008 | -0.010 | 0.660** | 0.456** | 1 |  |
| ASSIST - Cocaine/Crack | 0.152 | 0.175 | 0.023 | 0.220 | 0.165 | 0.289 | 0.322* | 0.111 | 0.104 | 0.082 | 0.146 | 0.212 | 0.198 | 1 |
| **. The correlation is significant at the 0.01 level (2-tailed). | | | | | | | | | | | | | | |
| *. The correlation is significant at the 0.05 level (2-tailed). | | | | | | | | | | | | | | |
| c. Cannot be calculated because at least one of the variables is constant. | | | | | | | | | | | | | | |
