# Supplementary material for: Depression in Cape Verdean Adolescents: Prevalence and Associated Factors
Source: Research Square preprint supplement (doi:10.21203/rs.3.rs-7448573/v1), 2025-09-22
Supplement: Supplementary file 2 [file 9cb312fd06e4eed92e0f16d9.docx]

**Annex 1**. Sample Characteristics

| **Variables** | | **Total** | | **Men** | | **Women** | |  |  |  |
| --- | --- | --- | --- | --- | --- | --- | --- | --- | --- | --- |
|  | | **n** | **%** | **n** | **%** | **n** | **%** |  |  |  |
| Sex | | 776 | 100 | 409 | 52.7 | 367 | 47.3 |  |  |  |
|  |  |  |  |  |  |  |  |  |  |  |
| Age | |  |  |  |  |  |  | **t** | **df** | **p** |
|  | 15 | 154 | 19.7 | 78 | 9.97 | 75 | 9.59 |  |  |  |
|  | 16 | 155 | 19.8 | 85 | 10.87 | 70 | 8.95 |  |  |  |
|  | 17 | 161 | 20.6 | 83 | 10.61 | 77 | 9.85 | .183 | 774 | 0.854 |
|  | 18 | 160 | 20.5 | 83 | 10.61 | 75 | 9.59 |  |  |  |
|  | 19 | 152 | 19.4 | 80 | 10.10 | 70 | 8.95 |  |  |  |
|  | Total | 782 | 100 | 409 | 53 | 367 | 47 |  |  |  |
|  |  |  |  |  |  |  |  | **Χ2** | **df** | **p** |
| Marital Status | |  |  |  |  |  |  |  |  |  |
|  | Single | 759 | 97.2 | 403 | 51.6 | 351 | 44.94 | 7.199a | 1 | .007 |
|  | Married/in a stable relationship | 22 | 2.8 | 5 | 0.64 | 16 | 2.05 |  |  |  |
|  | Total | 781 | 100 | 408 | 53 | 367 | 48 |  |  |  |
| Education | |  |  |  |  |  |  |  |  |  |
|  | No education (never attended school) | 3 | 0.4 | 2 | 0.26 | 1 | 0.13 | 12.845a | 3 | .005 |
|  | Primary/Basic | 91 | 11.6 | 63 | 8.1 | 28 | 3.58 |  |  |  |
|  | Secondary/Middle | 660 | 84.4 | 327 | 41.82 | 327 | 41.81 |  |  |  |
|  | University | 28 | 3.6 | 17 | 2.17 | 11 | 1.41 |  |  |  |
|  | Total | 782 | 100 | 409 | 52.35 | 367 | 46.93 |  |  |  |
| Employment status | |  |  |  |  |  |  |  |  |  |
|  | Employed | 45 | 5.82 | 30 | 3.88 | 15 | 1.94 | 11.224ª | 4 | .024 |
|  | Unemployed | 64 | 8.28 | 42 | 5.43 | 22 | 2.85 |  |  |  |
|  | Student or on an unpaid internship/apprenticeship | 648 | 83.83 | 330 | 42.69 | 318 | 41.14 |  |  |  |
|  | Domestic | 12 | 1.55 | 4 | 0.52 | 8 | 1.03 |  |  |  |
|  | Another situation of inactivity | 4 | 0.51 | 3 | 0.39 | 1 | 0.13 |  |  |  |
|  | Total | 773 | 100 | 409 | 53 | 364 | 47 |  |  |  |
| Family income | |  |  |  |  |  |  |  |  |  |
|  | < 5000$00 | 26 | 3.67 | 11 | 2.92 | 15 | 4.52 | 17.718a | 8 | .023 |
|  | 5.000$00 – 15.000$00 | 154 | 21.72 | 77 | 20.42 | 77 | 23.19 |  |  |  |
|  | 16.000$00 – 25.000$00 | 84 | 11.85 | 41 | 10.88 | 43 | 12.95 |  |  |  |
|  | 26.000$00 – 45.000$00 | 53 | 7.48 | 25 | 6.63 | 28 | 8.43 |  |  |  |
|  | 46.000$00 – 65.000$00 | 34 | 4.80 | 23 | 6.10 | 11 | 3.31 |  |  |  |
|  | 66.000$00 – 85.000$00 | 17 | 2.40 | 8 | 2.12 | 9 | 2.71 |  |  |  |
|  | 86.000$00 – 100.000$00 | 8 | 1.13 | 8 | 2.12 | 0 | 0 |  |  |  |
|  | > 100.000$00 | 3 | 0.42 | 0 | 0 | 3 | 0.90 |  |  |  |
|  | They didn't want to answer | 330 | 46.54 | 184 | 48.81 | 146 | 43.96 |  |  |  |
|  | Total | 709 | 100 | 377 | 100 | 332 | 100 |  |  |  |
| Nacionality | |  |  |  |  |  |  |  |  |  |
|  | Cabo-verdiana | 772 | 99.4 | 402 | 51.74 | 364 | 46.85 | 2.251a | 2 | .324 |
|  | Other | 2 | 0.3 | 2 | 0.25 | 0 | 0 |  |  |  |
|  | Dual | 3 | 0.4 | 1 | 0.13 | 2 | 0.25 |  |  |  |
|  | Total | 777 | 100 | 405 | 52.12 | 366 | 47.10 |  |  |  |
| Religion | |  |  |  |  |  |  |  |  |  |
|  | Catholic | 479 | 72.1 | 240 | 36.14 | 237 | 35.69 | 10.173a | 6 | .118 |
|  | Other religions | 99 | 14.9 | 51 | 7.68 | 46 | 6.93 |  |  |  |
|  | No religion | 86 | 13.0 | 44 | 6.63 | 41 | 6.17 |  |  |  |
|  | Total | 664 | 100 | 335 | 52.02 | 324 | 48.79 |  |  |  |
| Practitioner of religion | |  |  |  |  |  |  |  |  |  |
|  | Yes | 345 | 53.7 | 151 | 23.48 | 193 | 30.02 | 12.857a | 1 | <.001 |
|  | No | 298 | 46.3 | 172 | 26.75 | 124 | 19.28 |  |  |  |
|  | Total | 643 | 100 | 323 | 50.23 | 317 | 49.30 |  |  |  |
| Suffer from any illness | |  |  |  |  |  |  |  |  |  |
|  | Yes | 71 | 9.3 | 33 | 4.34 | 38 | 5 | 1.251a | 1 | .263 |
|  | No | 689 | 90.7 | 365 | 48.03 | 318 | 41.84 |  |  |  |
|  | Total | 760 | 100 | 398 | 52.37 | 356 | 46.84 |  |  |  |
