# Supplementary material for: Depression in Cape Verdean Adolescents: Prevalence and Associated Factors
Source: Research Square preprint supplement (doi:10.21203/rs.3.rs-7448573/v1), 2025-09-22
Supplement: Supplementary file 3 [file dfb791da563010276ee31dc9.docx]

**Annex 2.** Levels of Depressive Symptoms by Sex and Municipality

| Variables | | **Levels of depressive symptoms** | | | | χ2 | *p* |
| --- | --- | --- | --- | --- | --- | --- | --- |
| **Minimal** | **Mild** | **Moderate** | **Severe** |  |  |
| Sex | | | | | | | |
|  | Male | 25 (60.1%) | 5 (12.2%) | 8 (19.5%) | 3 (7.3%) | **6.001** | **0.112** |
| Female | 29 (38.7%) | 13 (17.3%) | 19 (25.3%) | 14 (18.7%) |  |  |
| Municipality | | | | | | | |
|  | Ribeira Grande | 1 (33.3%) | 1 (33.3%) | -- | 1 (33.3%) | **56.025** | **0.287a** |
| Paúl | -- | -- | -- | -- |
| Porto Novo | -- | 1 (33.3%) | -- | 2 (66.7%) |
| São Vicente | 9 (42.9%) | 5 (23.8%) | 4 (19%) | 3 (14.3%) |
| Ribeira Brava | -- | -- | -- | -- |
| Tarrafal de São Nicolau | -- | -- | 2 (100%) | -- |
| Sal | 1 (16.7%) | 1 (16.7%) | 3 (50%) | 1 (16.7%) |
| Boavista | 3 (50%) | -- | 3 (50%) | -- |
| Maio | 2 (100%) | -- | -- | -- |
| Tarrafal | 2 (100%) | -- | -- | -- |
| Santa Catarina | 3 (42.9%) | 1 (14.3%) | 1 (14.3%) | 2 (28.6%) |
| Santa Cruz | 2 (33.3%) | -- | 4(66.7%) | -- |
| Praia | 19 (57.6%) | 5 (15.2%) | 4 (12.1%) | 5 (15.2%) |
| São Domingos | 3 (60%) | 1 (20%) | 1 (20%) | -- |
| São Miguel | 1 (50%) | 1 (50%) | -- | -- |
| São Salvador do Mundo | -- | -- | -- | -- |
| São Lourenço dos Órgãos | -- | -- | -- | -- |
| Ribeira Grande de Santiago | 1 (100%) | -- | -- | -- |
| Mosteiro | -- | 1 (33.3%) | 1 (33.3%) | 1 (33.3%) |
| São Felipe | 5 (50%) | 2 (20%) | 2 (20%) | 1 (10%) |
| Santa Catarina do Fogo | 1 (50%) | -- | 1 (50%) | -- |
| Brava | 3 (60%) | -- | 2 (40%) | -- |
